# Supplementary material for: Zinc Status of Horses and Ponies: Relevance of Health, Horse Type, Sex, Age, and Test Material
Source: MDPI journal article supplement (doi:10.3390/vetsci10040295), 2023-04-16
Supplement: s1 [file s1]

**Supplementary Table S1:** Age of the control group and the subgroups of the patients with internal diseases. Median (minimum-maximum).

| Study population                        | <i>n</i> | Age (years) |                           | <i>p</i> -value <sup>1</sup> |
|-----------------------------------------|----------|-------------|---------------------------|------------------------------|
| Control group                           | (221)    | 10.9        | (0.03-38.3) <sup>a</sup>  | < 0.001                      |
| Patients with gastrointestinal diseases | (188)    | 12.9        | (0.01-41.0) <sup>c</sup>  |                              |
| respiratory diseases                    | (40)     | 12.6        | (0.20-27.6) <sup>ac</sup> |                              |
| eye diseases                            | (22)     | 8.85        | (0.02-31.6) <sup>ac</sup> |                              |
| skin diseases                           | (4)      | 21.2        | (11.2-25.6) <sup>bc</sup> |                              |
| metabolic diseases                      | (21)     | 20.6        | (0.00-30.7) <sup>b</sup>  |                              |
| further diseases                        | (42)     | 10.5        | (0.00-28.0) <sup>a</sup>  |                              |

<sup>1</sup> Kruskal-Wallis test for the overall group comparison; single group comparisons by the Mann-Whitney U-test: varying exponents in the column indicate a significant group difference ( $p < 0.05$ )

**Supplementary Table S2:** Plasma zinc (Zn) concentrations (μmol/L) of the hospitalized horses and ponies with internal diseases, depending on the sex of the animals of the six subgroups. Median (minimum-maximum).

| Patients with             | Sex      | <i>n</i> | Plasma Zn |             | <i>p</i> -value <sup>1</sup> |
|---------------------------|----------|----------|-----------|-------------|------------------------------|
| gastrointestinal diseases | Mare     | (98)     | 13.3      | (2.02-33.4) | 0.902                        |
|                           | Stallion | (17)     | 13.9      | (5.82-31.8) |                              |
|                           | Gelding  | (73)     | 13.1      | (3.77-56.4) |                              |
| respiratory diseases      | Mare     | (25)     | 11.5      | (8.60-29.9) | 0.492                        |
|                           | Stallion | (5)      | 11.8      | (4.42-18.9) |                              |
|                           | Gelding  | (10)     | 15.1      | (9.46-48.6) |                              |
| eye diseases              | Mare     | (7)      | 14.2      | (4.63-17.6) | 0.240                        |
|                           | Stallion | (5)      | 15.9      | (14.7-24.9) |                              |
|                           | Gelding  | (10)     | 14.7      | (6.42-64.3) |                              |
| skin diseases             | Mare     | (1)      | 7.32      | -           | 0.180                        |
|                           | Stallion | (0)      | -         | -           |                              |
|                           | Gelding  | (3)      | 16.2      | (11.9-16.9) |                              |
| metabolic diseases        | Mare     | (7)      | 18.5      | (7.13-22.4) | 0.904                        |
|                           | Stallion | (3)      | 14.9      | (7.31-26.4) |                              |
|                           | Gelding  | (11)     | 17.5      | (10.8-29.0) |                              |
| further diseases          | Mare     | (20)     | 13.9      | (3.72-28.9) | 0.723                        |
|                           | Stallion | (8)      | 13.3      | (7.27-19.2) |                              |
|                           | Gelding  | (14)     | 13.4      | (0.82-31.3) |                              |

<sup>1</sup> Kruskal-Wallis test

**Supplementary Table S3:** Sample size (*n*) and percentage distribution (%) of the horse types of the present study.

| Category 1 |        |        | Category 2 |                     |                     |                     |
|------------|--------|--------|------------|---------------------|---------------------|---------------------|
| Horse type | Ponies | Horses | Ponies     | Cold-blooded horses | Warm-blooded horses | Thoroughbred horses |
| <i>n</i>   | 154    | 384    | 154        | 16                  | 342                 | 26                  |
| %          | 28.6   | 71.4   | 28.6       | 2.97                | 63.6                | 4.83                |

**Supplementary Table S4:** Plasma Zn concentrations ( $\mu\text{mol/L}$ ) of the hospitalized horses and ponies with internal diseases, depending on the horse type of the animals of the six subgroups. Median (minimum-maximum).

| Patients with             | Horse type | <i>n</i> | Plasma Zn |             | <i>p</i> -value <sup>1</sup> |
|---------------------------|------------|----------|-----------|-------------|------------------------------|
| gastrointestinal diseases | Ponies     | (54)     | 13.6      | (4.22-56.4) | 0.087                        |
|                           | Horses     | (134)    | 12.6      | (2.02-33.4) |                              |
| respiratory diseases      | Ponies     | (17)     | 11.5      | (4.42-48.6) | 0.075                        |
|                           | Horses     | (23)     | 15.5      | (8.60-29.9) |                              |
| eye diseases              | Ponies     | (3)      | 15.1      | (14.2-15.6) | 0.962                        |
|                           | Horses     | (19)     | 14.7      | (4.63-64.3) |                              |
| skin diseases             | Ponies     | (3)      | 11.9      | (7.32-16.9) | 0.655                        |
|                           | Horses     | (1)      | 16.2      | -           |                              |
| metabolic diseases        | Ponies     | (11)     | 17.5      | (11.2-26.4) | 0.526                        |
|                           | Horses     | (10)     | 17.6      | (7.13-29.0) |                              |
| further diseases          | Ponies     | (9)      | 13.2      | (7.12-19.9) | 0.382                        |
|                           | Horses     | (33)     | 13.7      | (0.82-31.3) |                              |

<sup>1</sup> Mann-Whitney U-test

**Supplementary Table S5:** Diagnoses and plasma Zn concentrations of the horses and ponies with metabolic disorders ( $n = 21$ )

| Horse/pony<br>(number) | Diagnosis                                                            | Plasma Zn<br>( $\mu\text{mol/L}$ ) |
|------------------------|----------------------------------------------------------------------|------------------------------------|
| 1                      | Chronic kidney disease; Polysaccharide Storage Myopathy; hepatopathy | 7.13                               |
| 2                      | Inflammation of the urethra                                          | 10.8                               |
| 3                      | Voiding dysfunction; inguinal hernias on both sides                  | 7.31                               |
| 4                      | Laminitis; acute allergic reaction (multiple edemata, disability)    | 11.2                               |
| 5                      | Abscess at the preputium                                             | 14.5                               |
| 6                      | Laminitis                                                            | 22.4                               |
| 7                      | Voiding dysfunction                                                  | 19.3                               |
| 8                      | Laminitis                                                            | 17.1                               |
| 9                      | Voiding dysfunction (sabulous cystitis)                              | 29.0                               |
| 10                     | Hypocalcemia (neurological symptoms)                                 | 18.0                               |
| 11                     | Pars Pituitary Intermedia Dysfunction                                | 24.0                               |
| 12                     | Pars Pituitary Intermedia Dysfunction                                | 17.5                               |
| 13                     | Pars Pituitary Intermedia Dysfunction                                | 18.9                               |
| 14                     | Pars Pituitary Intermedia Dysfunction                                | 26.4                               |
| 15                     | Pars Pituitary Intermedia Dysfunction                                | 20.3                               |
| 16                     | Pars Pituitary Intermedia Dysfunction                                | 18.5                               |
| 17                     | Pars Pituitary Intermedia Dysfunction                                | 18.7                               |
| 18                     | Pars Pituitary Intermedia Dysfunction                                | 17.4                               |
| 19                     | Pars Pituitary Intermedia Dysfunction                                | 15.3                               |
| 20                     | Pars Pituitary Intermedia Dysfunction                                | 14.7                               |
| 21                     | Pars Pituitary Intermedia Dysfunction                                | 14.9                               |
